# Supplementary material for: Polycomb contraction differentially regulates terminal human hematopoietic differentiation programs
Source: PubMed Central journal article supplement (PMC9102747; doi:10.1186/s12915-022-01315-1), 2022-05-13
Supplement: 12915_2022_1315_MOESM3_ESM.pdf [file 12915_2022_1315_MOESM3_ESM.pdf]

Original Gel Image Figure 5D

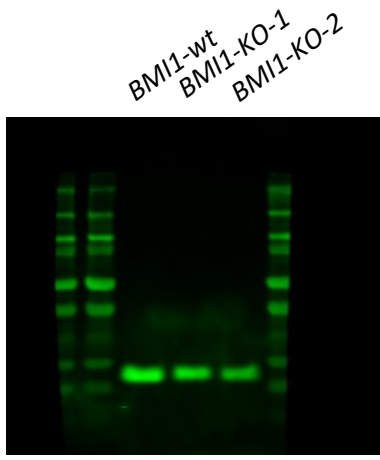

H3K27me3

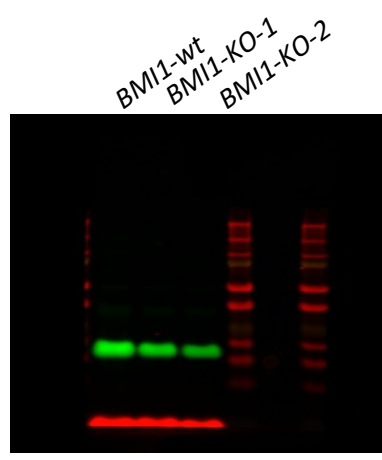

H3K9me3

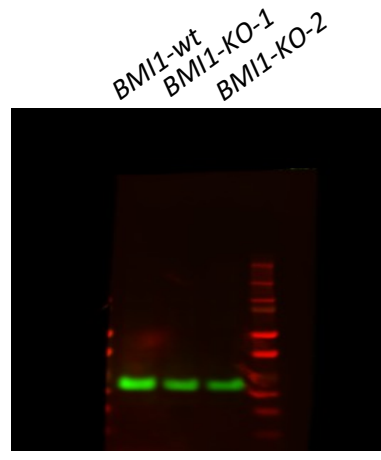

H2AK119Ub

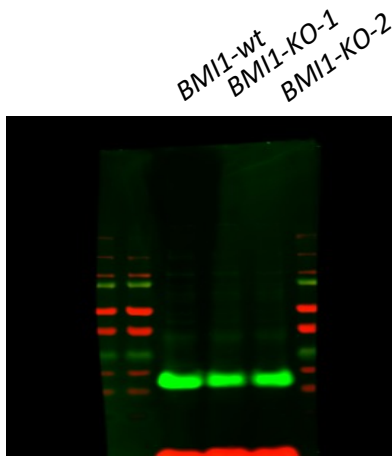

H3

Original Gel Image Figure S5B and E

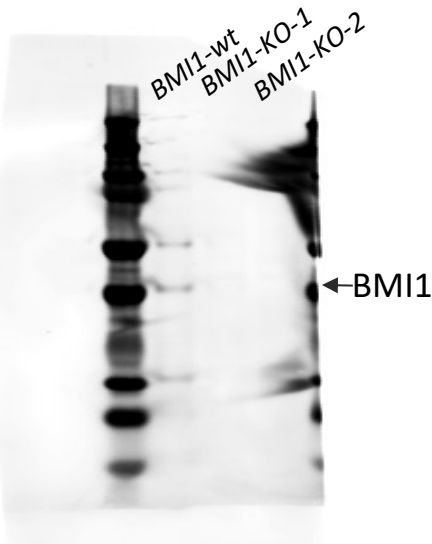

←BMI1

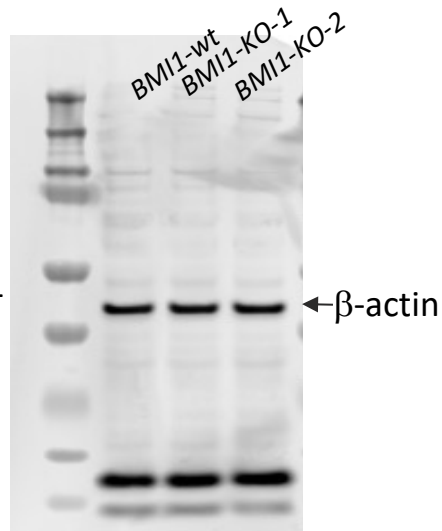

←β-actin

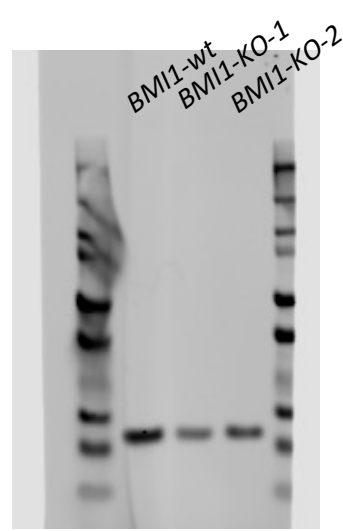

H3K27me3

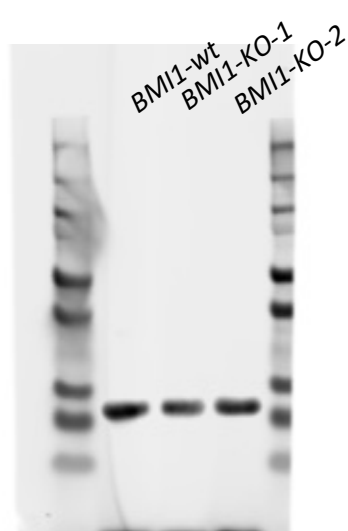

H3
